# Supplementary material
Source: ML conference proceedings conference paper supplement (https://proceedings.mlr.press/v119/cutkosky20b.html)
Supplement: Supplementary file [file cutkosky20b-supp.pdf]

## A. Proof of Theorem 4

**Theorem 4.** *Suppose that  $f$  and  $\mathcal{D}$  satisfies (A1), (A2), (A3), and (A4). Further, suppose  $\|\nabla f(\vec{w}, \xi)\| \leq \mathfrak{g}$  for all  $\vec{w}$  with probability 1, and that  $F(\vec{w}) \leq M$  for all  $\vec{w}$  for some  $M$ . Then Algorithm 2 guarantees:*

$$\frac{1}{T} \sum_{t=1}^T \mathbb{E} [\|\nabla F(\vec{w}_t)\|] \leq \tilde{O} \left( \frac{1}{\sqrt{T}} + \frac{\sigma^{4/7}}{T^{2/7}} \right)$$

where the  $\tilde{O}$  notation hides constants that depend on  $R$ ,  $G$ , and  $M$  and a factor of  $\log(T)$ .

*Proof.* Notice from the definition of  $\alpha$  that we always have

$$\begin{aligned} \alpha_t &= \frac{1}{C^2 t^{1/7} G_{t-1}^{3/7}} \\ &\leq \frac{1}{C^2 D^{3/7}} \\ &\leq 1 \end{aligned}$$

where we defined  $G_0 = D$ . Thus  $\alpha_t \leq 1$  always.

We begin with the now-familiar definitions:

$$\begin{aligned} \epsilon_t &= \nabla f(\vec{x}_t, \xi_t) - \nabla F(\vec{x}_t) \\ \epsilon'_t &= \nabla f(\vec{x}_t, \xi'_t) - \nabla F(\vec{x}_t) \\ \hat{\epsilon}_t &= \vec{m}_t - \nabla F(\vec{w}_t) \end{aligned}$$

Notice that  $\mathbb{E}[\langle \epsilon_i, \epsilon_j \rangle] = \sigma^2 \delta_{i,j}$ . Now we write the recursive formulation for  $\hat{\epsilon}_{t+1}$ :

$$\begin{aligned} \vec{m}_t &= (1 - \alpha_t) \vec{m}_{t-1} + \alpha_t \nabla f(\vec{x}_t, \xi_t) \\ &= (1 - \alpha_t) (\nabla F(\vec{w}_{t-1}) + \hat{\epsilon}_{t-1}) + \alpha_t (\nabla F(\vec{w}_t) + \epsilon_t) \\ &= \nabla F(\vec{w}_t) + (1 - \alpha_t) Z(\vec{w}_{t-1}, \vec{w}_t) + \alpha_t Z(\vec{x}_t, \vec{w}_t) + (1 - \alpha_t) \hat{\epsilon}_{t-1} + \alpha_t \epsilon_t \\ \hat{\epsilon}_t &= (1 - \alpha_t) Z(\vec{w}_{t-1}, \vec{w}_t) + \alpha_t Z(\vec{x}_t, \vec{w}_t) + (1 - \alpha_t) \hat{\epsilon}_{t-1} + \alpha_t \epsilon_t \end{aligned}$$

Unfortunately, it is no longer clear how to unroll this recurrence to solve for  $\hat{\epsilon}_t$  in a tractable manner. Instead, we will take a different path, inspired by the potential function analysis of (Cutkosky & Orabona, 2019). Start with the observations:

$$\begin{aligned} \alpha_t \|Z(\vec{x}_t, \vec{w}_t)\| &\leq \rho \frac{(1 - \alpha_t)^2 \eta_{t-1}^2}{\alpha_t} \leq \rho \frac{(1 - \alpha_t) \eta_{t-1}^2}{\alpha_t} \\ (1 - \alpha_t) \|Z(\vec{w}_{t-1}, \vec{w}_t)\| &\leq (1 - \alpha_t) \rho \eta_{t-1}^2 \leq \rho \frac{(1 - \alpha_t) \eta_{t-1}^2}{\alpha_t} \end{aligned}$$

Define  $K_t = \frac{1}{\alpha_t^2 \eta_{t-1} G_t}$ . Then we use  $(a + b)^2 \leq (1 + 1/x)a^2 + (1 + x)b^2$  for all  $x$  and the fact that  $\epsilon_t$  is uncorrelated with anything that does not depend on  $\xi_t$  to obtain:

$$\begin{aligned} \mathbb{E}[K_t \|\hat{\epsilon}_t\|^2] &\leq \mathbb{E} \left[ K_t (1 + 1/x) 4\rho^2 \frac{(1 - \alpha_t)^2 \eta_{t-1}^4}{\alpha_t^2} + K_t (1 + x) (1 - \alpha_t)^2 \|\epsilon_{t-1}\|^2 + K_t \alpha_t^2 \|\epsilon_t\|^2 \right] \\ &\leq \mathbb{E} \left[ K_t \rho^2 \frac{8(1 - \alpha_t)^2 \eta_{t-1}^4}{\alpha_t^3} + K_t (1 - \alpha_t) \|\epsilon_{t-1}\|^2 + K_t \alpha_t^2 \|\epsilon_t\|^2 \right] \end{aligned}$$

where in the last inequality we have set  $x = \alpha_t$ . This implies:

$$\begin{aligned} \mathbb{E}[K_t \|\hat{\epsilon}_t\|^2 - K_{t-1} \|\hat{\epsilon}_{t-1}\|^2] &\leq \mathbb{E} \left[ K_t \rho^2 \frac{8(1 - \alpha_t)^2 \eta_{t-1}^4}{\alpha_t^3} + (K_t (1 - \alpha_t) - K_{t-1}) \|\epsilon_{t-1}\|^2 + K_t \alpha_t^2 \|\epsilon_t\|^2 \right] \\ &\leq \mathbb{E} \left[ \rho^2 \frac{8(1 - \alpha_t)^2 \eta_{t-1}^3}{\alpha_t^5 G_t} + \frac{\|\epsilon_t\|^2}{G_t \eta_{t-1}} - \left( \frac{1}{\alpha_{t-1}^2 G_{t-1} \eta_{t-2}} - \frac{1}{\alpha_t^2 G_t \eta_{t-1}} + \frac{1}{\alpha_t G_t \eta_{t-1}} \right) \|\epsilon_{t-1}\|^2 \right] \end{aligned}$$

Let  $\delta_t = G_t - G_{t-1}$ . Then we have  $\mathbb{E}[\epsilon_t/\sqrt{G_t\eta_{t-1}}] = 0 = \mathbb{E}[\epsilon'_t/\sqrt{G_t\eta_{t-1}}]$ . Therefore we have

$$\begin{aligned}\mathbb{E}\left[\frac{\|\epsilon_t\|^2}{G_t}\right] &\leq \mathbb{E}\left[\frac{\|\nabla f(\vec{x}_t, \xi_t)\|^2}{G_t}\right] \\ \mathbb{E}\left[\frac{\|\epsilon_t\|^2}{G_t}\right] &\leq \mathbb{E}\left[\frac{\|\nabla f(\vec{x}_t, \xi_t) - \nabla f(\vec{x}_t, \xi'_t)\|^2}{G_t}\right]\end{aligned}$$

so that we have

$$\mathbb{E}\left[\frac{\|\epsilon_t\|^2}{G_t}\right] \leq \mathbb{E}\left[\frac{\delta_{t+1}}{G_t}\right]$$

Now, observe that  $\delta_{t+1} \leq 2\mathbf{g}^2$ , so that we have

$$\begin{aligned}\mathbb{E}\left[\frac{\delta_{t+1}}{G_t\eta_{t-1}}\right] &= \mathbb{E}\left[\frac{\delta_{t+1}/\eta_{t-1}}{D + 3\mathbf{g}^2 + \sum_{\tau=1}^t \delta_\tau}\right] \\ &\leq \mathbb{E}\left[\frac{1}{\eta_T} \frac{\delta_{t+1}}{D + 2\mathbf{g}^2 + \sum_{\tau=1}^{t+1} \delta_\tau}\right] \\ &\leq \mathbb{E}\left[\frac{1}{\eta_T} \frac{\delta_{t+1}}{D + \sum_{\tau=1}^{t+1} \delta_\tau}\right] \\ \sum_{t=2}^{T+1} \mathbb{E}\left[\frac{\|\epsilon_t\|^2}{G_t\eta_{t-1}}\right] &\leq \mathbb{E}\left[\frac{1}{\eta_T} \log\left(\frac{G_{T+1}}{D}\right)\right]\end{aligned}$$

where we have used the fact that  $\eta_t$  is non-increasing.

Next, we tackle  $\rho^2 \frac{8(1-\alpha_t)^2 \eta_{t-1}^3}{\alpha_t^5 G_t}$ . We have

$$\begin{aligned}\sum_{t=2}^{T+1} \mathbb{E}\left[\frac{\eta_{t-1}^3}{\alpha_t^5 G_t}\right] &\leq \sum_{t=2}^{T+1} \mathbb{E}\left[\frac{\eta_{t-1}^4}{\eta_T \alpha_t^5 G_{t-1}}\right] \\ &\leq \sum_{t=2}^{T+1} \mathbb{E}\left[\frac{C^{14}}{t\eta_T}\right] \\ &\leq C^{14} \log(T+2) \mathbb{E}[\eta_T^{-1}]\end{aligned}$$

Now, finally we turn to bounding  $-\left(\frac{1}{\alpha_{t-1}^2 G_{t-1} \eta_{t-2}} - \frac{1}{\alpha_t^2 G_t \eta_{t-1}} + \frac{1}{\alpha_t G_t \eta_{t-1}}\right) \|\epsilon_{t-1}\|^2$ . To do this, we first upper-bound  $\frac{1}{\alpha_t^2 G_t \eta_{t-1}} - \frac{1}{\alpha_{t-1}^2 G_{t-1} \eta_{t-2}}$ . Note that:

$$\frac{1}{\alpha_t^2 G_t \eta_{t-1}} - \frac{1}{\alpha_{t-1}^2 G_{t-1} \eta_{t-2}} \leq \frac{1}{\alpha_t^2 G_t \eta_{t-1}} - \frac{1}{\alpha_{t-1}^2 G_t \eta_{t-2}}$$

So now we can upper bound  $\frac{1}{\alpha_t^2 \eta_{t-1}} - \frac{1}{\alpha_{t-1}^2 \eta_{t-2}}$  and divide the bound by  $G_t$ .

$$\begin{aligned}\frac{1}{\alpha_t^2 \eta_{t-1}} - \frac{1}{\alpha_{t-1}^2 \eta_{t-2}} &= t^2 \eta_{t-1}^3 G_{t-1}^2 - (t-1)^2 \eta_{t-2}^3 G_{t-2}^2 \\ &= C^3 (t^{5/7} G_{t-1}^{8/7} - (t-1)^{5/7} G_{t-2}^{8/7}) \\ &\leq C^3 t^{5/7} (G_{t-1}^{8/7} - G_{t-2}^{8/7}) + C^3 (t^{5/7} - (t-1)^{5/7}) G_{t-1}^{8/7}\end{aligned}$$

Next, we analyze  $G_{t-1}^{8/7} - G_{t-2}^{8/7}$ . Recall our definition  $\delta_t = G_t - G_{t-1}$ , and we have  $0 \leq \delta_t \leq 2\mathbf{g}^2$  for all  $t$ . Then by convexity of the function  $x \mapsto x^{8/7}$ , we have

$$G_{t-1}^{8/7} - G_{t-2}^{8/7} \leq \frac{8\delta_{t-1}}{7} G_{t-1}^{1/7} \leq \frac{16\mathbf{g}^2}{7} G_{t-1}^{1/7}$$

Therefore we have

$$\begin{aligned} \frac{1}{\alpha_t^2 \eta_{t-1}} - \frac{1}{\alpha_{t-1}^2 \eta_{t-2}} &\leq \frac{16C^3 \mathfrak{g}^2}{7} t^{5/7} G_{t-1}^{1/7} + C^3 (t^{5/7} - (t-1)^{5/7}) G_{t-1}^{8/7} \\ &= \frac{16C^3 \mathfrak{g}^2 t^{1/7}}{7 G_{t-1}^{4/7}} t^{4/7} G_{t-1}^{5/7} + C^3 (t^{5/7} - (t-1)^{5/7}) G_{t-1}^{8/7} \end{aligned}$$

Now use  $G_{t-1} \geq \mathfrak{g}^2 t^{1/4}$ ,

$$\begin{aligned} &\leq \frac{16C^3 \mathfrak{g}^{6/7}}{7} t^{4/7} G_{t-1}^{5/7} + C^3 (t^{5/7} - (t-1)^{5/7}) G_{t-1}^{8/7} \\ &\leq \frac{16C^3 \mathfrak{g}^{6/7}}{7} t^{4/7} G_{t-1}^{5/7} + \frac{5C^3}{7(t-1)^{2/7}} G_{t-1}^{8/7} \end{aligned}$$

Use  $G_{t-1} \leq D + 3\mathfrak{g}^2(t-1)$ ,

$$\begin{aligned} &\leq \frac{16C^3 \mathfrak{g}^{6/7}}{7} t^{4/7} G_{t-1}^{5/7} + \frac{5C^3 (D + 3\mathfrak{g}^2(t-1))^{3/7}}{7(t-1)^{2/7}} G_{t-1}^{5/7} \\ &\leq \frac{21C^3 \mathfrak{g}^{6/7}}{7} t^{4/7} G_{t-1}^{5/7} + \frac{5C^3 D^{3/7}}{7(t-1)^{2/7}} G_{t-1}^{5/7} \end{aligned}$$

Use the definition of  $D$ ,

$$\leq \frac{21C^3 \mathfrak{g}^{6/7}}{7} t^{4/7} G_{t-1}^{5/7} + \frac{5C}{7(t-1)^{2/7}} G_{t-1}^{5/7}$$

Use  $C \geq 1/\mathfrak{g}^{3/7}$ ,

$$\leq \frac{26C^3 \mathfrak{g}^{6/7}}{7} t^{4/7} G_{t-1}^{5/7}$$

Now observe that

$$\frac{26C^3 \mathfrak{g}^{6/7}}{7} t^{4/7} G_{t-1}^{5/7} \leq \frac{26C^2 \mathfrak{g}^{6/7}}{7\alpha_t \eta_{t-1}}$$

So putting all this together, we have

$$-\left( \frac{1}{\alpha_{t-1}^2 G_{t-1} \eta_{t-2}} - \frac{1}{\alpha_t^2 G_t \eta_{t-1}} + \frac{1}{\alpha_t G_t \eta_{t-1}} \right) \leq -\left( \frac{1}{\alpha_t G_t \eta_{t-1}} - \frac{26C^2 \mathfrak{g}^{6/7}}{7\alpha_t G_t \eta_{t-1}} \right)$$

Then since we set  $C$  so that  $\frac{26C^2 \mathfrak{g}^{6/7}}{7} = 1/2$ , we obtain:

$$-\left( \frac{1}{\alpha_{t-1}^2 G_{t-1} \eta_{t-2}} - \frac{1}{\alpha_t^2 G_t \eta_{t-1}} + \frac{1}{\alpha_t G_t \eta_{t-1}} \right) \leq -\frac{1}{2\alpha_t G_t \eta_{t-1}}$$

Putting all this together, we have shown:

$$\sum_{t=1}^T \mathbb{E}[K_{t+1} \|\hat{\epsilon}_{t+1}\|^2 - K_t \|\hat{\epsilon}_t\|^2] \leq \mathbb{E} \left[ \frac{\log(T+2)}{\eta_T} + \frac{1}{\eta_T} \log \left( \frac{G_{T+1}}{D} \right) - \sum_{t=1}^T \frac{\|\hat{\epsilon}_t\|^2}{2\alpha_{t+1} G_{t+1} \eta_t} \right]$$

Now, define the potential  $\Phi_t = \frac{3F(\bar{w}_{t+1})}{\eta_t} + K_{t+1} \|\hat{\epsilon}_{t+1}\|^2$ . Then, by Lemma 2, we obtain:

$$\begin{aligned} \Phi_t - \Phi_{t-1} &\leq -\|\nabla F(\bar{w}_t)\| + 8\|\hat{\epsilon}_t\| + \frac{3L\eta_t}{2} \\ &\quad + 3F(\bar{w}_t) \left( \frac{1}{\eta_t} - \frac{1}{\eta_{t-1}} \right) + K_{t+1} \|\hat{\epsilon}_{t+1}\|^2 - K_t \|\hat{\epsilon}_t\|^2 \end{aligned}$$

So summing over  $t$  and taking expectations yields:

$$\begin{aligned} \mathbb{E}[\Phi_T - \Phi_0] \leq \mathbb{E} \left[ \sum_{t=1}^T \frac{3L\eta_t}{2} - \|\nabla F(\bar{w}_t)\| + \frac{3M}{\eta_T} + \sum_{t=1}^T 8\|\hat{\epsilon}_t\| - \frac{\|\hat{\epsilon}_t\|^2}{2\alpha_{t+1}G_{t+1}\eta_t} \right. \\ \left. + \frac{1}{\eta_T} \log\left(\frac{G_{T+1}}{D}\right) + \frac{\log(T+2)}{\eta_T} \right] \end{aligned}$$

Now, we examine the term  $\sum_{t=1}^T 8\|\hat{\epsilon}_t\| - \frac{\|\hat{\epsilon}_t\|^2}{2\alpha_{t+1}G_{t+1}\eta_t}$ . By Cauchy-Schwarz we have:

$$\sum_{t=1}^T 8\|\hat{\epsilon}_t\| \leq 8\sqrt{\sum_{t=1}^T \frac{\|\hat{\epsilon}_t\|^2}{2\alpha_{t+1}G_{t+1}\eta_t} \sum_{t=1}^T 2\alpha_{t+1}G_{t+1}\eta_t}$$

Therefore

$$\begin{aligned} \sum_{t=1}^T 8\|\hat{\epsilon}_t\| - \frac{\|\hat{\epsilon}_t\|^2}{2\alpha_{t+1}G_{t+1}\eta_t} &\leq \sup_M 8\sqrt{M \sum_{t=1}^T 2\alpha_{t+1}G_{t+1}\eta_t} - M \\ &\leq 32 \sum_{t=1}^T \alpha_{t+1}G_{t+1}\eta_t \\ &= 32 \sum_{t=1}^T \frac{1}{(t+1)\eta_t} \\ &\leq 32 \sum_{t=1}^T \frac{1}{(t+1)\eta_T} \\ &\leq \frac{32(\log(T+1))}{\eta_T} \end{aligned}$$

Finally, observe that since  $G_t \geq \mathfrak{g}^2 t^{1/4}$ , we have  $\eta_t \leq \frac{C}{\sqrt{T}}$ . Therefore  $\sum_{t=1}^T \eta_t \leq 2C\sqrt{T}$ . Putting all this together again, we have

$$\sum_{t=1}^T \mathbb{E}[\|\nabla F(\bar{w}_t)\|] \leq \Phi_0 + 3LC\sqrt{T} + \mathbb{E}[\eta_T^{-1}] [3M + \log(2\mathfrak{g}^2(T+1)/D) + \log(T+2) + 32(\log(T+1))]$$

Observe that we have  $\Phi_0 \leq \frac{3M}{\eta_0} + K_1\mathfrak{g}^2$ .

Let us define  $Z = 3M + \log(2\mathfrak{g}^2(T+1)/D) + \log(T+2) + 32(\log(T+1))$ . Then we have

$$\sum_{t=1}^T \mathbb{E}[\|\nabla F(\bar{w}_t)\|] \leq \Phi_1 + 3LC\sqrt{T} + \mathbb{E}[\eta_T^{-1}]Z$$

Now we look carefully at the definition of  $G_t$  and  $\eta_t$ . By Jensen inequality, we have

$$\begin{aligned} \mathbb{E}[\eta_T^{-1}] &= \frac{1}{C}(T+1)^{3/7} \mathbb{E} \left[ \left( D + 2\mathfrak{g}^2 + \mathfrak{g}T^{1/4} + \sum_{t=1}^T \|\nabla f(\bar{x}_t, \xi_t) - \nabla f(\bar{x}_t, \xi'_t)\|^2 \right)^{2/7} \right] \\ &\leq \frac{(T+1)^{3/7}(D + 2\mathfrak{g}^2 + \mathfrak{g}T^{1/4} + 4T\sigma^2)^{2/7}}{C} \\ &= O\left(\sqrt{T} + \sigma^{4/7}T^{5/7}\right) \end{aligned}$$

The Theorem statement now follows. □
